# Supplementary material for: Predictors of Non-invasive Ventilation Response Do Not Indicate Response to High Flow Nasal Oxygen: A Bicentric Observational Study.
Source: Research Square preprint supplement (doi:10.21203/rs.3.rs-1058510/v1), 2021-11-18
Supplement: Supplementary file 1 [file 2cb74f413bc8e380eb26a1b4.docx]

Table 3

| **Variable** | **estimate** | **OR** | **95% LL** | **95% UL** | **p-value** | **n NR/ n R** | **unit** |
| --- | --- | --- | --- | --- | --- | --- | --- |
| ROX baseline | 0.1886 | 1.2075 | 1.053 | 1.3847 | 0.0069* | 23/ 89 | 1 |
| FiO2 baseline | -0.0477 | 0.9534 | 0.9232 | 0.9846 | 0.0037* | 24/ 90 | 1 |
| SpO2/FiO2 baseline | 0.009 | 1.0091 | 1.002 | 1.0161 | 0.0115* | 24/ 90 | 1 |
| ROX 2h | 0.1713 | 1.1869 | 1.05 | 1.3416 | 0.0061* | 28/ 90 | 1 |
| FiO2 2h | -0.0298 | 0.9706 | 0.9499 | 0.9918 | 0.0068* | 30/ 92 | 1 |
| SpO2/FiO2 2h | 0.0069 | 1.0069 | 1.0009 | 1.0129 | 0.0235* | 30/ 92 | 1 |
| ROX 6h | 0.2059 | 1.2286 | 1.0645 | 1.4181 | 0.0049* | 22/ 83 | 1 |
| FiO2 6h | -0.0353 | 0.9653 | 0.9417 | 0.9895 | 0.0052* | 25/ 89 | 1 |
| SpO2/FiO2 6h | 0.0143 | 1.0144 | 1.0056 | 1.0233 | 0.0012* | 22/ 87 | 1 |
