# Supplementary material for: Predictors of Non-invasive Ventilation Response Do Not Indicate Response to High Flow Nasal Oxygen: A Bicentric Observational Study.
Source: Research Square preprint supplement (doi:10.21203/rs.3.rs-1058510/v1), 2021-11-18
Supplement: Supplementary file 2 [file 4224ea7eb14f42fb0a0a185a.docx]

Table 2

| **Variable** | **estimate** | **OR** | **95% LL** | **95% UL** | **p-value** | **n NR/ n R** | **unit** |
| --- | --- | --- | --- | --- | --- | --- | --- |
| RR | -0.0436 | 0.9574 | 0.9063 | 1.0113 | 0.1195 | 24/ 89 | 1 |
| PaO2 | 0.0079 | 1.0079 | 0.9765 | 1.0403 | 0.6249 | 24/ 90 | 1 |
| PaCO2 | 0.0108 | 1.0109 | 0.9784 | 1.0444 | 0.5161 | 24/ 90 | 1 |
| SpO2 | 0.0092 | 1.0093 | 0.9482 | 1.0743 | 0.7718 | 26/ 90 | 1 |
| pH | 0.1363 | 1.1461 | 0.6832 | 1.9226 | 0.6055 | 24/ 90 | 0.1 |
| Group A | -1.2337 | 0.2912 | 0.1098 | 0.7726 | 0.0132* | 32/ 95 | 1 |
| HR | -0.0155 | 0.9846 | 0.9622 | 1.0075 | 0.1861 | 26/ 90 | 1 |
| BE | 0.0691 | 1.0716 | 0.9914 | 1.1583 | 0.0815 | 24/ 90 | 1 |
| SOFA Score | -0.1099 | 0.896 | 0.785 | 1.0226 | 0.1034 | 25/ 90 | 1 |
| SAPS-III | -0.0111 | 0.9889 | 0.9497 | 1.0298 | 0.5905 | 32/ 95 | 1 |
