# Supplementary material for: Predictors of Non-invasive Ventilation Response Do Not Indicate Response to High Flow Nasal Oxygen: A Bicentric Observational Study.
Source: Research Square preprint supplement (doi:10.21203/rs.3.rs-1058510/v1), 2021-11-18
Supplement: Supplementary file 3 [file 61793d706abce6cc703154c5.docx]

Table 1

|  | | **Group A**  **responder** | | **Group A**  **non - responder** | | **Group B**  **responder** | | **Group B**  **non - responder** | |
| --- | --- | --- | --- | --- | --- | --- | --- | --- | --- |
|  | |  | |  | |  | |
| **n** | **(%)** | **n** | **(%)** | **n** | **(%)** | **n** | **(%)** |
|  | | 42 |  | 6 |  | 53 |  | 26 |  |
| **Reason for admission** | Cardiovascular | 12 | (29%) | 0 | (0%) | 6 | (11%) | 4 | (15%) |
| Infection/sepsis | 12 | (29%) | 1 | (17%) | 8 | (15%) | 10 | (39%) |
| Respiratory | 16 | (38%) | 5 | (83%) | 31 | (59%) | 11 | (42%) |
| Monitoring | 2 | (5%) | 0 | (0%) | 8 | (15%) | 1 | (4%) |
| **Underlying respiratory illness** |  | 26 | (62%) | 3 | (50%) | 37 | (70%) | 13 | (50%) |
| **Indication for HFNO** | Postextubation support | 42 | (100%) | 6 | (100%) | 0 | (0%) | 0 | (0%) |
| Respiratory failure | 0 | (0%) | 0 | (0%) | 53 | (100%) | 26 | (100%) |
| **Male Sex** |  | 19 | (45%) | 5 | (83%) | 31 | (58%) | 15 | (58%) |
|  |  |  | |  | |  | |  | |
| **Age** |  | 69  (51-77) | | 71  (47-75) | | 64  (55-76) | | 67  (58-78) | |
| **Mortality risk** | SOFA-Score | 7  (5-10) | | 10  (7-12) | | 6  (5-8) | | 7  (5-11) | |
| **Severity of illness** | SAPS III | 52  (42-57) | | 49  (45-56) | | 50  (44-56) | | 51  (43-59) | |
